# Supplementary material for: Room temperature O transfer from N2O to CO mediated by the nearest Cd(i) ions in MFI zeolite cavities
Source: Royal Society of Chemistry journal article supplement (doi:10.1039/c8dt04425b), 2018-12-22
Supplement: c8dt04425b1.pdf [file c8dt04425b1.pdf]

## **Supporting Information**

### **Room Temperature O Transfer from N<sub>2</sub>O to CO Mediated by Nearest Cd(I) Ions in MFI Zeolite Cavity**

## Supplementary figures and tables

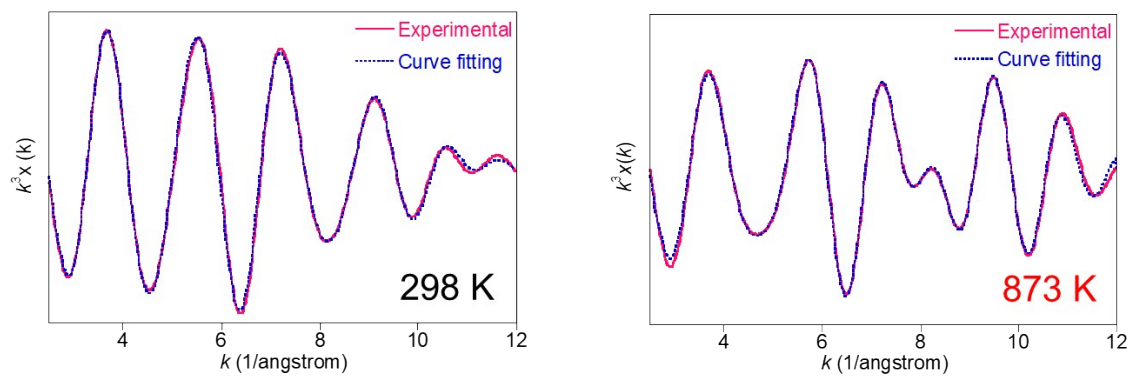

**Fig. S1** Comparisons of the Fourier-transformed EXAFS ( $2 < k < 12 \text{ \AA}^{-1}$ ) with the curve fitting data: (left) 298 K- and (right) 873 K-evacuated samples.

**Table S1** Qualitative EXAFS analysis of Cd–O and Cd–Cd contributions.

| Sample                | 1st (Cd–O) |         |                              | 2nd (Cd–Cd) |             |                              |
|-----------------------|------------|---------|------------------------------|-------------|-------------|------------------------------|
|                       | CN         | $R$ [Å] | $\sigma^2$ [Å <sup>2</sup> ] | CN          | $R$ [Å]     | $\sigma^2$ [Å <sup>2</sup> ] |
| 298 K-evacuated CdMFI | 7.0        | 2.32    | 0.013                        | 1.1         | 3.02        | 0.013                        |
| 873 K-evacuated CdMFI | 3.5        | 2.27    | 0.015                        | <b>0.9</b>  | <b>2.67</b> | 0.009                        |

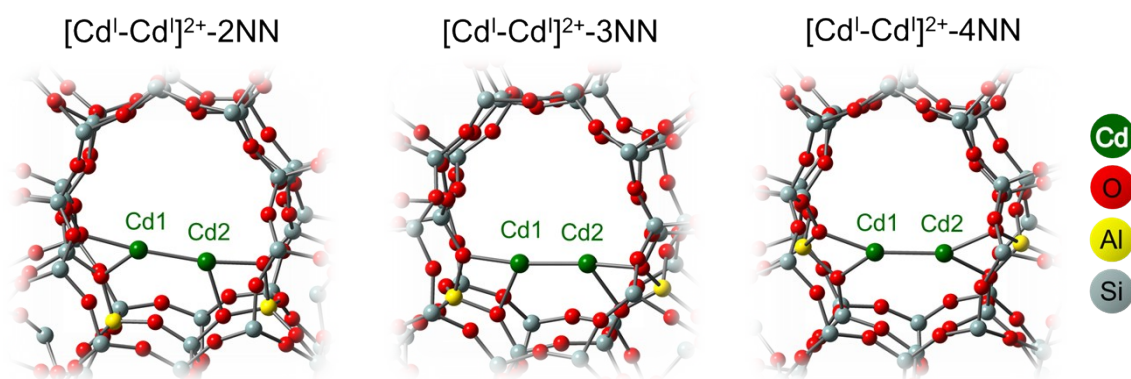

**Fig. S2** Optimized  $[\text{Cd}^{\text{I}}-\text{Cd}^{\text{II}}]^{2+}$ -MFI models, i.e.,  $[\text{Cd}_2]^{2+}-[\text{Al}_2\text{Si}_{90}\text{O}_{151}\text{H}_{66}]^{2-}$  clusters, having different Al arrays.

**Table S2** Selected DFT parameters of the  $[\text{Cd}^{\text{I}}-\text{Cd}^{\text{II}}]^{2+}$ -MFI models shown in Fig. S2: Cd–Cd distance ( $R_{\text{Cd1}-\text{Cd2}}$ ), natural charge ( $q_{\text{Cd1}}$ ,  $q_{\text{Cd2}}$ ), and  $\sigma-\sigma^*$  energy ( $E_{\sigma-\sigma^*}$ ).

| Sites                                                    | $R_{\text{Cd1}-\text{Cd2}}$ [ $\text{\AA}$ ] | $q_{\text{Cd1}}^{\text{a}}$ | $q_{\text{Cd2}}^{\text{a}}$ | $E_{\sigma-\sigma^*}$ [ $\text{cm}^{-1}$ ] |
|----------------------------------------------------------|----------------------------------------------|-----------------------------|-----------------------------|--------------------------------------------|
| $[\text{Cd}^{\text{I}}-\text{Cd}^{\text{II}}]^{2+}$ -2NN | 2.63                                         | +0.68                       | +0.75                       | 38250                                      |
| $[\text{Cd}^{\text{I}}-\text{Cd}^{\text{II}}]^{2+}$ -3NN | 2.63                                         | +0.71                       | +0.73                       | 40430                                      |
| $[\text{Cd}^{\text{I}}-\text{Cd}^{\text{II}}]^{2+}$ -4NN | 2.69                                         | +0.72                       | +0.74                       | 40650                                      |

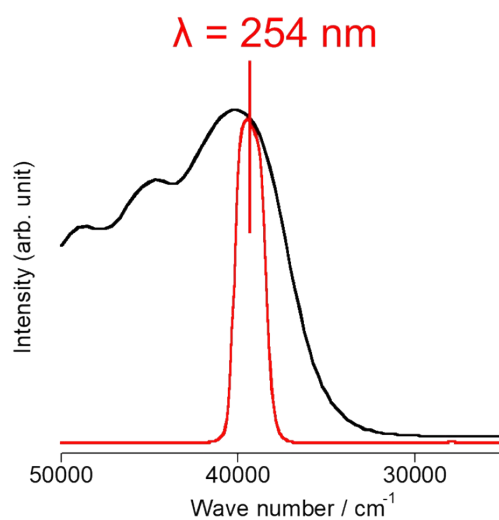

**Fig. S3** Energy distributions of the 254 nm light applying to the photoactivation of the Cd<sup>I</sup>-Cd<sup>I</sup> bond (red line). For comparison, the UV-vis spectrum of the 873 K-activated CdMFI sample is included (black line). The 254 nm light was generated using a 254 nm band pass filter.

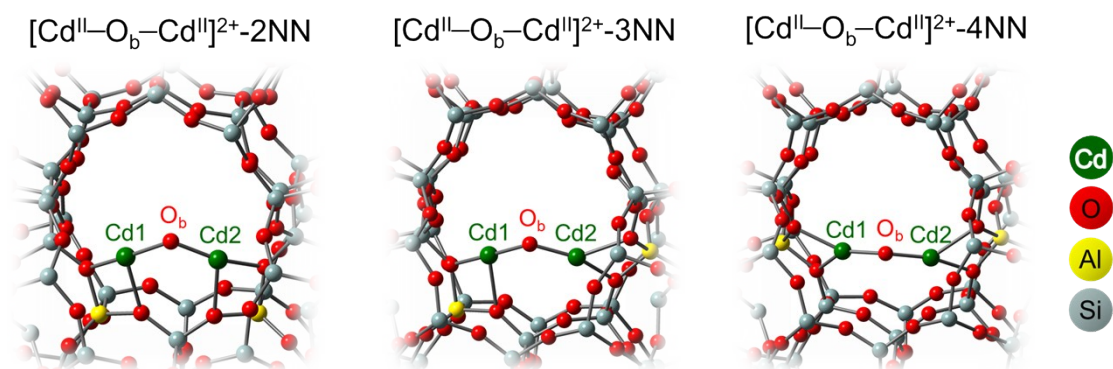

**Fig. S4** Optimized  $[\text{Cd}^{\text{II}}-\text{O}_b-\text{Cd}^{\text{II}}]^{2+}$ -MFI models, i.e.,  $[\text{Cd}_2\text{O}]^{2+}-[\text{Al}_2\text{Si}_{90}\text{O}_{151}\text{H}_{66}]^{2-}$ , having different Al arrays.

**Table S3** Selected DFT parameters of the  $[\text{Cd}^{\text{II}}-\text{O}_b-\text{Cd}^{\text{II}}]^{2+}$ -MFI models shown in Fig. S4: bond distance ( $R_{\text{Cd1}-\text{O}_b}$ ,  $R_{\text{Cd2}-\text{O}_b}$ ,  $R_{\text{Cd1}-\text{Cd2}}$ ), bond angle ( $\angle\text{Cd}-\text{O}_b-\text{Cd}$ ) natural charge ( $q_{\text{Cd1}}$ ,  $q_{\text{Cd2}}$ ,  $q_{\text{O}_b}$ ), and LMCT energy ( $E_{\text{LMCT}}$ ).

| Sites | $R_{\text{Cd1}-\text{O}_b}$<br>[Å] | $R_{\text{Cd2}-\text{O}_b}$<br>[Å] | $R_{\text{Cd1}-\text{Cd2}}$<br>[Å] | $\angle\text{Cd}-\text{O}_b-\text{Cd}$<br>[°] | $q_{\text{Cd1}}$ | $q_{\text{Cd2}}$ | $q_{\text{O}_b}$ | $E_{\text{LMCT}}^a$<br>[cm <sup>-1</sup> ] |
|-------|------------------------------------|------------------------------------|------------------------------------|-----------------------------------------------|------------------|------------------|------------------|--------------------------------------------|
| 2NN   | 2.01                               | 2.02                               | 3.39                               | 114                                           | 1.26             | 1.26             | -1.18            | 40900                                      |
| 3NN   | 2.01                               | 2.01                               | 3.49                               | 121                                           | 1.27             | 1.30             | -1.19            | 42000                                      |
| 4NN   | 2.00                               | 2.01                               | 3.60                               | 128                                           | 1.31             | 1.32             | -1.21            | 42400                                      |

<sup>a</sup>The most intense peak positions in the UV-vis spectra calculated by TD-DFT are described.

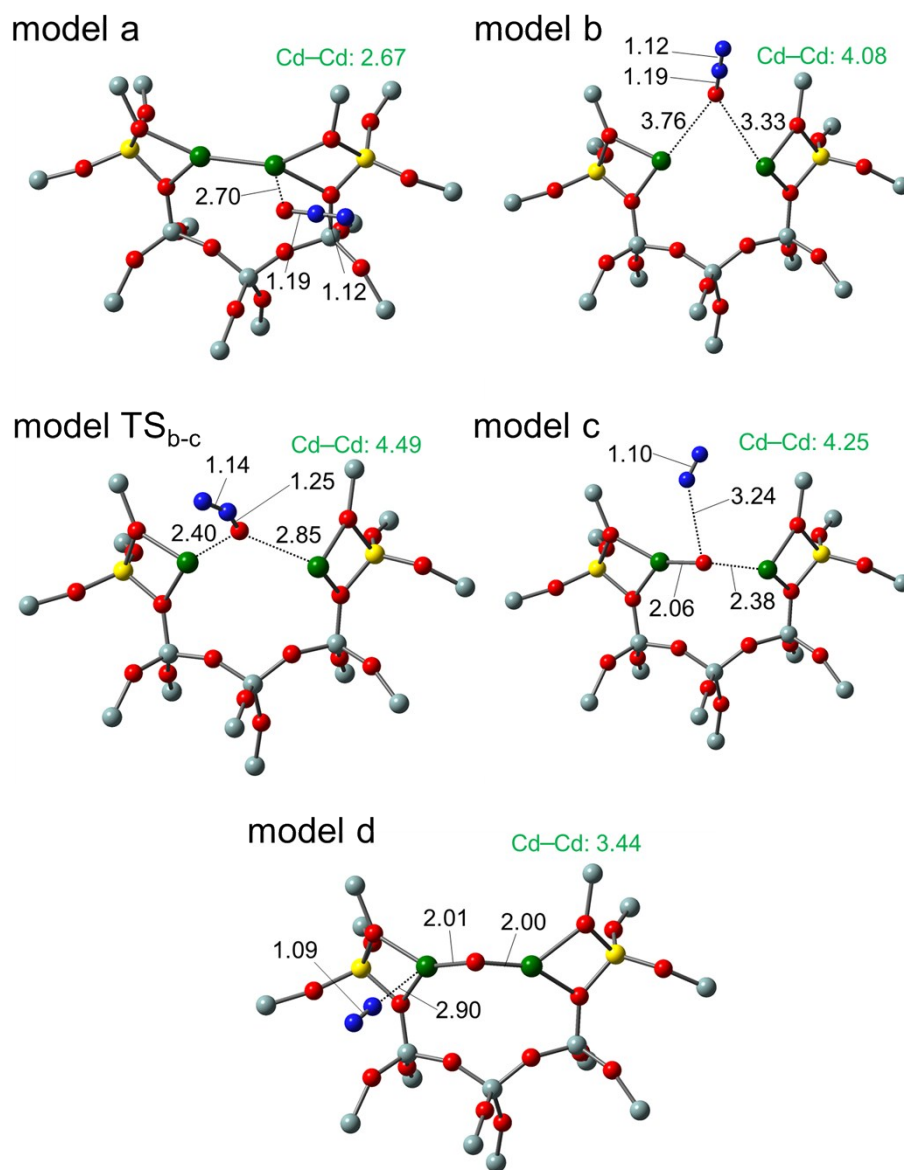

**Fig. S5** Structural details of the optimized geometries ( $[\text{Cd}_2\text{N}_2\text{O}]^{2+}$ - $[\text{Al}_2\text{Si}_{15}\text{O}_{16}\text{H}_{36}]^{2-}$ ,  $S = 0$  or  $1$ ) shown in Fig. 8, where terminated H atoms were omitted. Selected bond lengths are given as black and green numbers (Å).

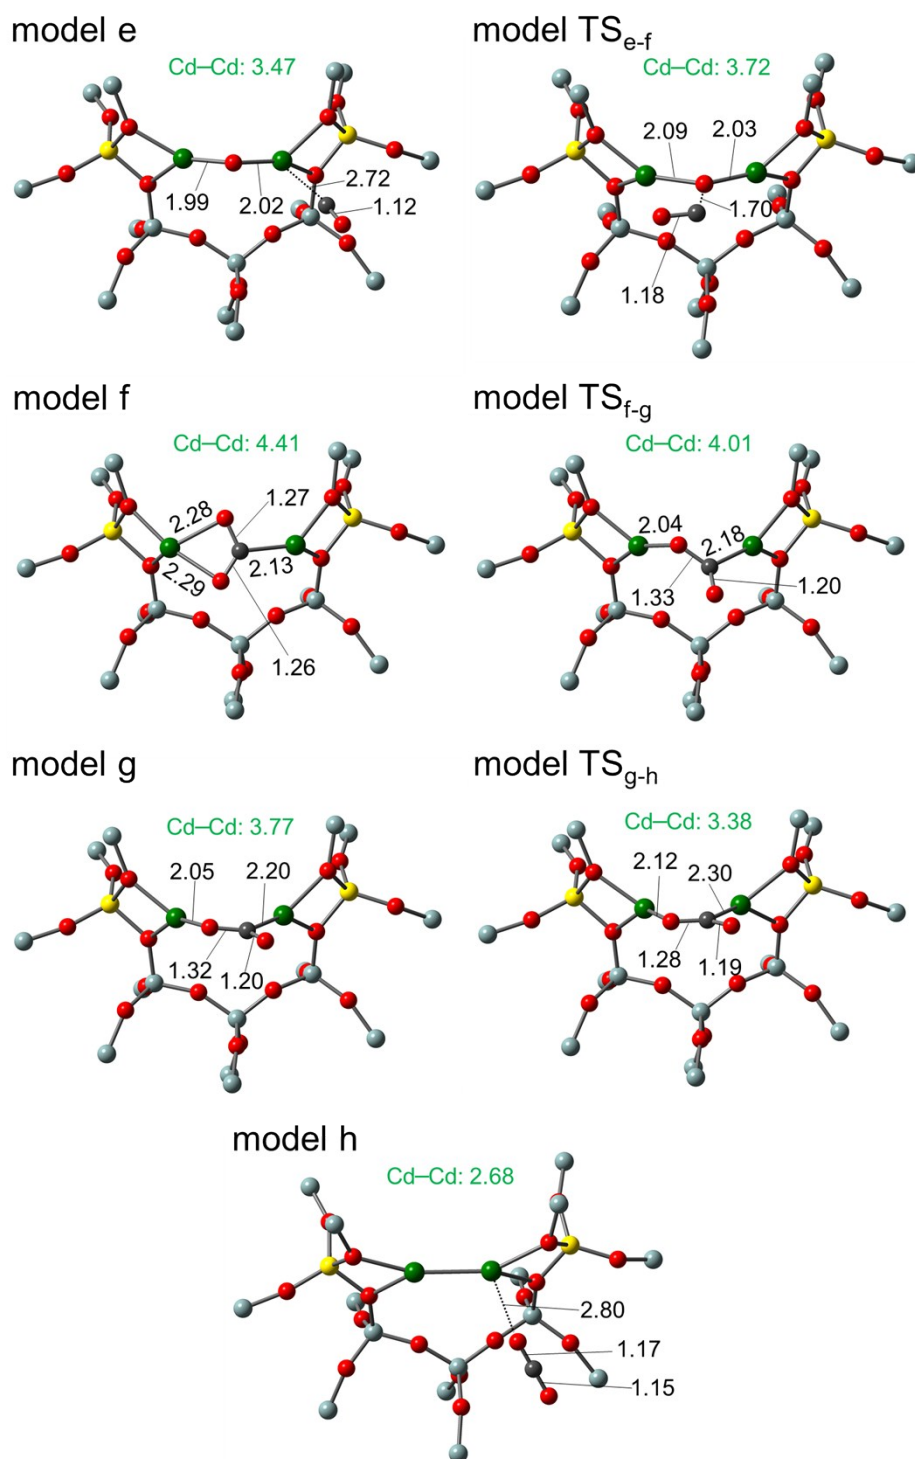

**Fig. S6** Structural details of the optimized geometries ( $[\text{Cd}_2\text{CO}_2]^{2+}$ - $[\text{Al}_2\text{Si}_{15}\text{O}_{16}\text{H}_{36}]^{2-}$ ,  $S = 0$ ) shown in Fig. 10, where terminated H atoms were omitted. Selected bond lengths are given as black and green numbers (Å).
